# Supplementary material
Source: publisher figshare collection journal article supplement (https://diabetesjournals.figshare.com/ndownloader/files/32760167)
Supplement: Supplementary file 1 [file 32760167]

## **SUPPLEMENTAL MATERIAL**

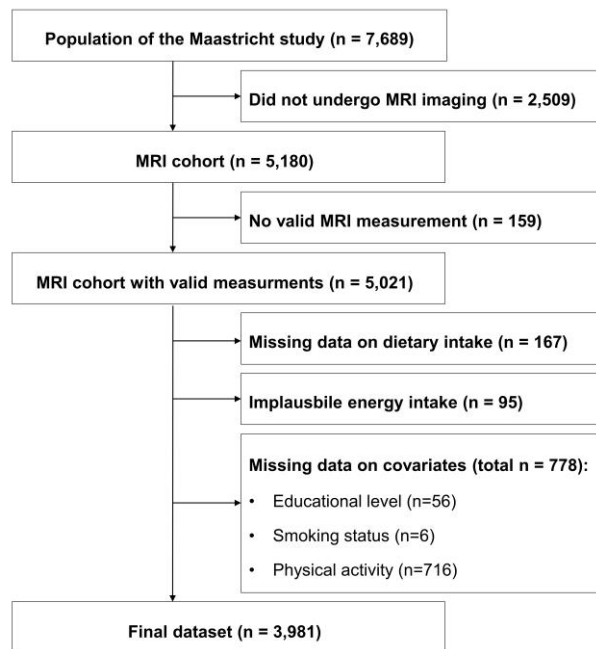

**Supplemental figure 1. Flowchart of the study population selection process.**

Abbreviation: MRI: Magnetic resonance imaging.

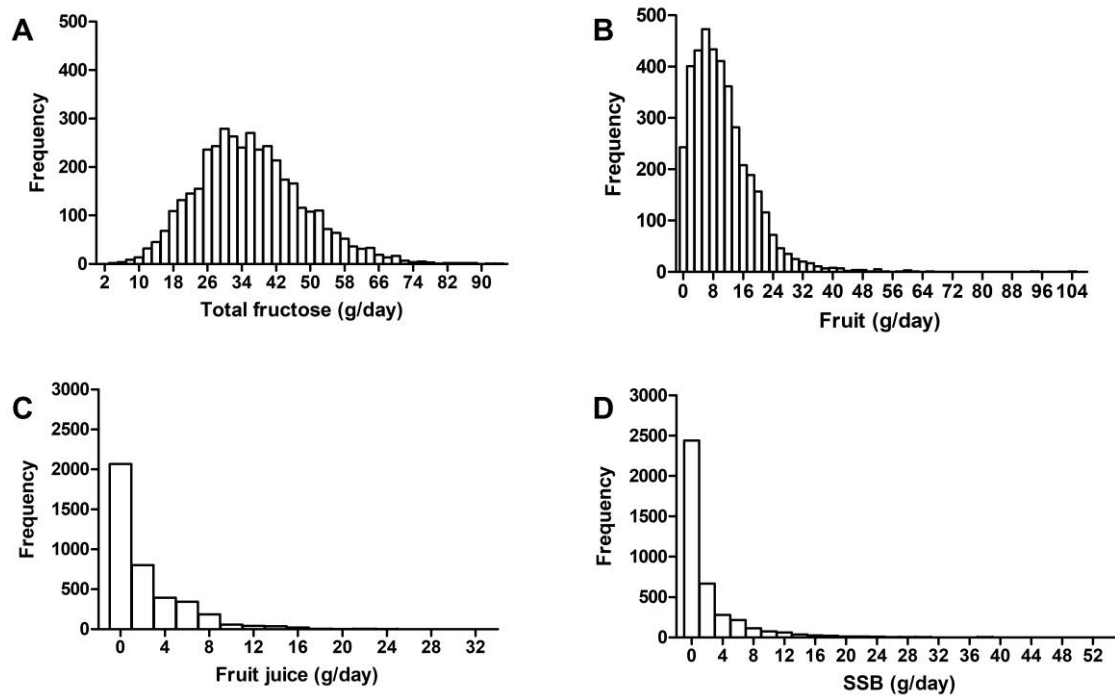

**Supplemental figure 2. Distribution of energy-adjusted intake of fructose (g/day): total fructose (A), fruit (B), fruit juice (C), and SSB (D).**

Abbreviation: SSB: sugar-sweetened beverages.

**Supplemental table 1. Multivariable-adjusted associations of energy-adjusted fructose intake and intrahepatic lipid content (IHL) stratified according to type 2 diabetes (individuals without type 2 diabetes [n=3,171] versus individuals with type 2 diabetes [n=810]).**

|                                                    | Individuals without type 2 diabetes (n=3,171) |                      |                      |                    | Individuals with type 2 diabetes (n=810) |                      |                      |                    |                          |
|----------------------------------------------------|-----------------------------------------------|----------------------|----------------------|--------------------|------------------------------------------|----------------------|----------------------|--------------------|--------------------------|
|                                                    | Energy-adjusted fructose intake tertiles      |                      |                      |                    | Energy-adjusted fructose intake tertiles |                      |                      |                    |                          |
| <b>Total fructose*<br/>Median g/day</b>            | <b>T1<br/>24.4</b>                            | <b>T2<br/>35.1</b>   | <b>T3<br/>47.6</b>   | <b>P for trend</b> | <b>T1<br/>24.4</b>                       | <b>T2<br/>35.1</b>   | <b>T3<br/>47.6</b>   | <b>P for trend</b> | <b>P for interaction</b> |
| Model 5                                            | 1                                             | 0.99 (0.93;<br>1.06) | 1.01 (0.94;<br>1.09) | 0.932              | 1                                        | 1.05 (0.92;<br>1.21) | 1.05 (0.90;<br>1.23) | 0.547              | <b>0.089</b>             |
| <b>Fructose from fruit*<br/>Median g/day</b>       | <b>T1<br/>3.1</b>                             | <b>T2<br/>9.0</b>    | <b>T3<br/>17.8</b>   | <b>P for trend</b> | <b>T1<br/>3.1</b>                        | <b>T2<br/>9.0</b>    | <b>T3<br/>17.8</b>   | <b>P for trend</b> |                          |
| Model 5                                            | 1                                             | 0.97 (0.91;<br>1.04) | 0.98 (0.91;<br>1.05) | 0.609              | 1                                        | 0.89 (0.78;<br>1.02) | 0.84 (0.72;<br>0.97) | 0.215              | <b>0.058</b>             |
| <b>Fructose from fruit juice*<br/>Median g/day</b> | <b>T1<br/>0.1</b>                             | <b>T2<br/>0.9</b>    | <b>T3<br/>5.3</b>    | <b>P for trend</b> | <b>T1<br/>0.1</b>                        | <b>T2<br/>0.9</b>    | <b>T3<br/>5.3</b>    | <b>P for trend</b> |                          |
| Model 5                                            | 1                                             | 0.99 (0.93;<br>1.05) | 1.03 (0.96;<br>1.09) | 0.133              | 1                                        | 1.14 (1.00;<br>1.31) | 1.08 (0.94;<br>1.24) | 0.114              | <b>0.071</b>             |
| <b>Fructose from SSB*<br/>Median g/day</b>         | <b>T1<br/>0.0</b>                             | <b>T2<br/>0.5</b>    | <b>T3<br/>4.5</b>    | <b>P for trend</b> | <b>T1<br/>0.0</b>                        | <b>T2<br/>0.5</b>    | <b>T3<br/>4.5</b>    | <b>P for trend</b> |                          |
| Model 5                                            | 1                                             | 0.99 (0.93;<br>1.05) | 1.08 (1.01;<br>1.16) | 0.032              | 1                                        | 1.21 (1.06;<br>1.38) | 1.14 (0.99;<br>1.32) | 0.076              | 0.132                    |

\* Energy-adjusted fructose by means of the residual method.

Regression coefficients should be interpreted as the fold change in IHL that is associated with the difference between the tertile of fructose intake and the reference group (see methods section).

P for trend values were obtained from linear regression with fructose as continuous variables (see methods section).

Data are presented for the fully adjusted model (i.e., with adjustment for age, sex, educational level, smoking status, physical activity, intake of total energy, and energy-adjusted intakes of alcohol, saturated fat, protein, vitamin E, and dietary fiber).

Abbreviation: SSB: sugar-sweetened beverages; T: tertile.

**Supplemental table 2. Multivariable-adjusted (including Matsuda index) associations of energy-adjusted fructose intake and intrahepatic lipid content (IHL) (n=1,415).**

|                                   | Energy-adjusted fructose intake tertiles |                  |                  |              |
|-----------------------------------|------------------------------------------|------------------|------------------|--------------|
| <b>Total fructose*</b>            | <b>T1</b>                                | <b>T2</b>        | <b>T3</b>        | <b>P for</b> |
| <b>Median g/day</b>               | <b>24.4</b>                              | <b>35.1</b>      | <b>47.6</b>      | <b>trend</b> |
| Model 5 <sup>#</sup>              | 11                                       | 0.99 (0.90-1.09) | 0.97 (0.87-1.09) | 0.598        |
| <b>Fructose from fruit*</b>       | <b>T1</b>                                | <b>T2</b>        | <b>T3</b>        | <b>P for</b> |
| <b>Median g/day</b>               | <b>3.1</b>                               | <b>9.0</b>       | <b>17.8</b>      | <b>trend</b> |
| Model 5 <sup>#</sup>              | 1                                        | 0.98 (0.90-1.08) | 0.96 (0.86-1.07) | 0.823        |
| <b>Fructose from fruit juice*</b> | <b>T1</b>                                | <b>T2</b>        | <b>T3</b>        | <b>P for</b> |
| <b>Median g/day</b>               | <b>0.1</b>                               | <b>0.9</b>       | <b>5.3</b>       | <b>trend</b> |
| Model 5 <sup>#</sup>              | 1                                        | 0.93 (0.85-1.02) | 1.00 (0.91-1.09) | 0.977        |
| <b>Fructose from SSB*</b>         | <b>T1</b>                                | <b>T2</b>        | <b>T3</b>        | <b>P for</b> |
| <b>Median g/day</b>               | <b>0.0</b>                               | <b>0.5</b>       | <b>4.5</b>       | <b>trend</b> |
| Model 5 <sup>#</sup>              | 1                                        | 0.99 (0.90-1.09) | 1.05 (0.95-1.16) | <b>0.046</b> |

\* Energy-adjusted fructose by means of the residual method.

# In this sensitivity analysis, the covariate type 2 diabetes was replaced by the Matsuda index.

Regression coefficients should be interpreted as the fold change in IHL that is associated with the difference between the tertile of fructose intake and the reference group (see methods section).

P for trend values were obtained from linear regression with fructose as continuous variables (see methods section).

Data are presented for the fully adjusted model (i.e., with adjustment for age, sex, the Matsuda index, educational level, smoking status, physical activity, intake of total energy, and energy-adjusted intakes of alcohol, saturated fat, protein, vitamin E, and dietary fiber).

Abbreviation: SSB: sugar-sweetened beverages; T: tertile.

**Supplemental table 3. Multivariable-adjusted associations of energy-adjusted fructose intake and alanine aminotransferase (n=1,602).**

|                                   | Energy-adjusted fructose intake tertiles |                  |                  |              |
|-----------------------------------|------------------------------------------|------------------|------------------|--------------|
| <b>Total fructose*</b>            | <b>T1</b>                                | <b>T2</b>        | <b>T3</b>        | <b>P for</b> |
| <b>Median g/day</b>               | <b>24.4</b>                              | <b>35.1</b>      | <b>47.6</b>      | <b>trend</b> |
| Model 5                           | 1                                        | 0.99 (0.94-1.04) | 0.99 (0.94-1.05) | 0.997        |
| <b>Fructose from fruit*</b>       | <b>T1</b>                                | <b>T2</b>        | <b>T3</b>        | <b>P for</b> |
| <b>Median g/day</b>               | <b>3.1</b>                               | <b>9.0</b>       | <b>17.8</b>      | <b>trend</b> |
| Model 5                           | 1                                        | 0.99 (0.95-1.04) | 0.99 (0.94-1.04) | 0.648        |
| <b>Fructose from fruit juice*</b> | <b>T1</b>                                | <b>T2</b>        | <b>T3</b>        | <b>P for</b> |
| <b>Median g/day</b>               | <b>0.1</b>                               | <b>0.9</b>       | <b>5.3</b>       | <b>trend</b> |
| Model 5                           | 1                                        | 0.98 (0.94-1.03) | 0.98 (0.94-1.03) | 0.998        |
| <b>Fructose from SSB*</b>         | <b>T1</b>                                | <b>T2</b>        | <b>T3</b>        | <b>P for</b> |
| <b>Median g/day</b>               | <b>0.0</b>                               | <b>0.5</b>       | <b>4.5</b>       | <b>trend</b> |
| Model 5                           | 1                                        | 0.98 (0.94-1.03) | 0.99 (0.94-1.04) | 0.310        |

\* Energy-adjusted fructose by means of the residual method.

Regression coefficients should be interpreted as the fold change in alanine aminotransferase that is associated with the difference between the tertile of fructose intake and the reference group (see methods section).

P for trend values were obtained from linear regression with fructose as continuous variables (see methods section).



Data are presented for the fully adjusted model (i.e., with adjustment for age, sex, type 2 diabetes, educational level, smoking status, physical activity, intake of total energy, and energy-adjusted intakes of alcohol, saturated fat, protein, vitamin E, and dietary fiber).

Abbreviation: SSB: sugar-sweetened beverages; T: tertile.
